# Supplementary material
Source: publisher site journal article supplement (https://static.cambridge.org/content/id/urn:cambridge.org:id:article:S0924933821022483/resource/name/S0924933821022483supp001.docx)
Supplement: Supplementary file 1 [file S0924933821022483supp001.docx]

Supplementary Table 1. The details of comorbidities with other psychiatric disorders in patients with schizophrenia.

| SCID  (Yes) | Male  N=120 | Female  N=100 |
| --- | --- | --- |
| Panic disorder | 0 | 1 |
| Phobia | 0 | 0 |
| General anxiety disorder | 0 | 0 |
| Alcohol abuse | 1 | 0 |
| Substance abuse | 2 | 0 |
| Obsessive compulsive disorder | 1 | 1 |
| Post-traumatic stress disorder | 1 | 0 |

SCID=Structured Clinical Interview for DSM IV Disorders

Supplementary Table 2. The detailed parameters of motion correction in patients and controls. .

| mm / degree | SZ | HC |  |  |
| --- | --- | --- | --- | --- |
| (mean±SD) | n=220 | n=220 | t | p |
| translation |  |  |  |  |
| x | -0.001±0.093 | 0.002±0.096 | -0.32 | 0.75 |
| y | 0.016±0.126 | -0.005±0.158 | 1.52 | 0.13 |
| z | -0.001±0.353 | -0.011±0.310 | 0.32 | 0.75 |
| rotation |  |  |  |  |
| pitch | 0.001±0.007 | 0.001±0.008 | -0.43 | 0.67 |
| roll | 0.000±0.003 | 0.000±0.004 | 0.22 | 0.82 |
| yaw | 0.000±0.003 | 0.001±0.003 | -0.76 | 0.45 |

Supplementary Table 3. The characteristics of our homogenous sub-samples in this study.

|  | Male | Female |  |  |
| --- | --- | --- | --- | --- |
| Subsamples | (N=235) | (N=205) | t / X2 | p |
| Dx (SZ/HC) | 120/115 | 100/105 | 0.23 | 0.70 |
| Age (years) | 30.96±9.35 | 32.62±9.53 | -1.85 | 0.07 |
| Education (years) | 13.86±2.79 | 14.15±2.71 | -1.09 | 0.28 |
| Age at onset | 21.47±6.25 | 23.59±7.29 | -2.33 | 0.02 |
| Length of illness | 9.81±8.16 | 8.98±7.99 | 0.77 | 0.44 |
| PANSS total | 37.63±34.65 | 35.82±35.68 | 0.51 | 0.61 |
| Positive subscale | 8.66±8.42 | 8.15±8.31 | 0.60 | 0.55 |
| Negative subscale | 9.90±9.37 | 9.38±9.76 | 0.54 | 0.59 |
| Psychopathology | 19.09±17.67 | 18.34±18.21 | 0.41 | 0.68 |
| Medication (% of total patients) | | |  |  |
| antipsychotics | 52.27 | 42.27 | 0.85 | 0.39 |
| antidepressant | 14.55 | 14.09 | 0.50 | 0.55 |
| mood stabilizers | 25.45 | 16.36 | 2.55 | 0.13 |

|  | age ≦ 30 | age>30 |  |  |
| --- | --- | --- | --- | --- |
| Subsamples | (N=212) | (N=228) | t / X2 | p |
| Dx (SZ/HC) | 106/106 | 114/114 | 0.00 | 1.00 |
| Sex (M/F) | 119/93 | 115/113 | 1.43 | 0.25 |
| Education (years) | 13.86±2.80 | 14.11±2.71 | -0.96 | 0.34 |
| Age at onset | 19.43±4.33 | 25.22±7.49 | -7.07 | 0.00 |
| Length of illness | 4.05±3.84 | 14.44±7.75 | -12.74 | 0.00 |
| PANSS total | 41.43±35.60 | 33.04±34.31 | 2.38 | 0.02 |
| Positive subscale | 9.69±8.64 | 7.40±8.01 | 2.71 | 0.01 |
| Negative subscale | 10.78±9.74 | 8.75±9.30 | 2.11 | 0.04 |
| Psychopathology | 21.07±18.08 | 16.86±17.58 | 2.34 | 0.02 |
| Medication (% of total patients) | | |  |  |
| antipsychotics | 45.45 | 49.09 | 0.02 | 1.00 |
| antidepressant | 12.73 | 15.91 | 0.49 | 0.55 |
| mood stabilizers | 13.64 | 28.18 | 15.36 | 0.00 |

SZ=schizophrenia; HC=healthy control; M=male; F=female; PANSS=Positive And Negative Syndrome Scale for Schizophrenia.
